# Supplementary material for: Hierarchical NiFe2O4/Fe2O3 nanotubes derived from metal organic frameworks for superior lithium ion battery anodes
Source: Royal Society of Chemistry journal article supplement (doi:10.1039/c4ta00200h), 2014-01-01
Supplement: c4ta00200h1.pdf [file c4ta00200h1.pdf]

## Electronic Supplementary Information (ESI)

### **Hierarchical NiFe<sub>2</sub>O<sub>4</sub>/Fe<sub>2</sub>O<sub>3</sub> nanotubes derived from metal organic frameworks for superior lithium ion battery anode**

Gang Huang<sup>ac</sup>, Feifei Zhang<sup>ac</sup>, Leilei Zhang<sup>ac</sup>, Xinchuan Du<sup>ac</sup>, Jianwei Wang<sup>ac</sup> and Limin Wang<sup>ab\*</sup>

<sup>a</sup> *State Key Laboratory of Rare Earth Resource Utilization, Changchun Institute of Applied Chemistry, CAS, Changchun, 130022, China*

<sup>b</sup> *Changzhou Institute of Energy Storage Materials and Devices, Changzhou 213000, China*

<sup>c</sup> *University of Chinese Academy of Sciences, Beijing 100049, China*

**Corresponding author:** Limin Wang, Email: [lmwang@ciac.ac.cn](mailto:lmwang@ciac.ac.cn), Tel: +86-431-85262447, Fax: +86-431-85262836.

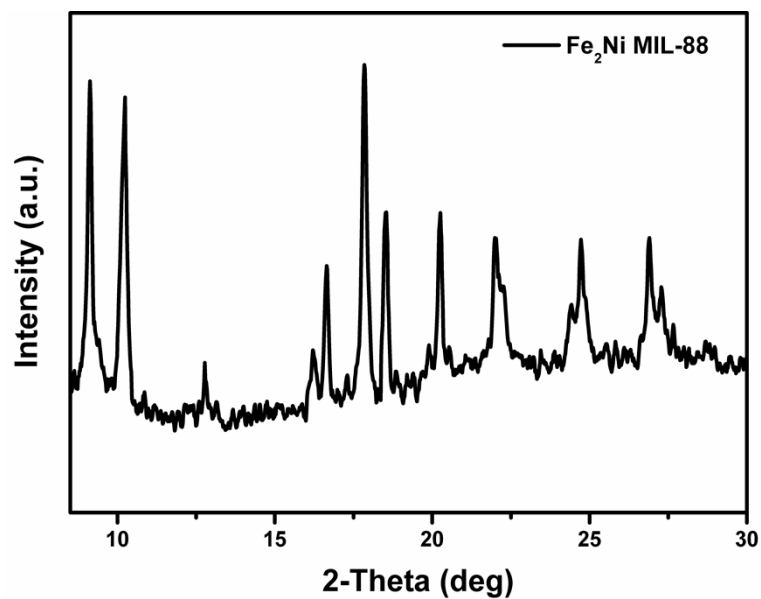

**Fig. S1** XRD patterns of the as-prepared Fe<sub>2</sub>Ni MIL-88 nanorods.

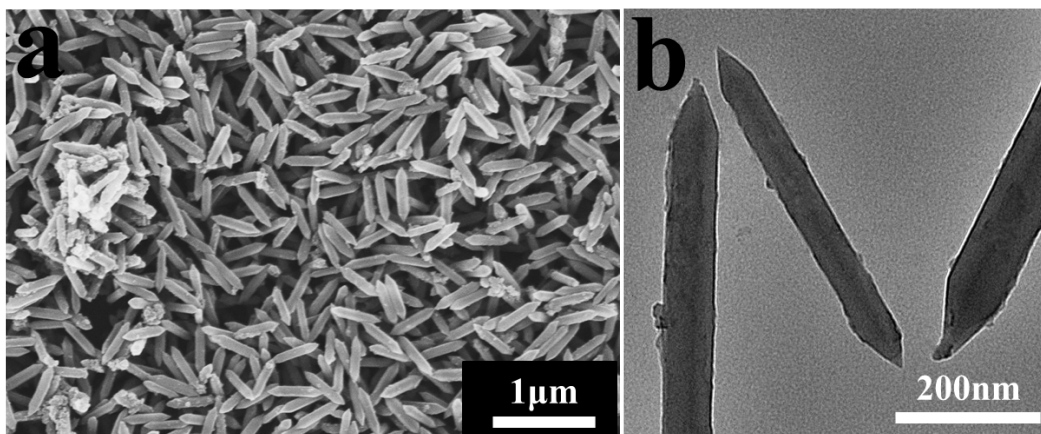

**Fig. S2** (a) SEM (b) TEM images of the as-prepared Fe<sub>2</sub>Ni MIL-88 nanorods.

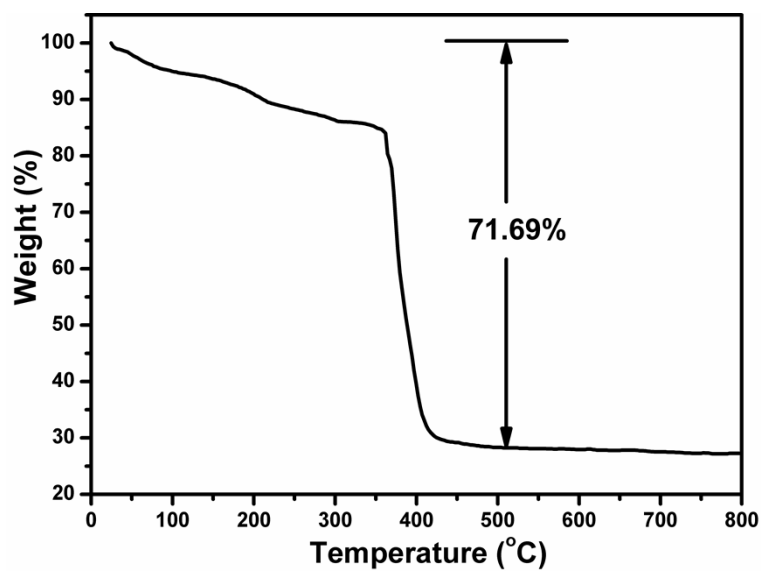

**Fig. S3** TG curve of the as-prepared core/shell Fe<sub>2</sub>Ni MIL-88/Fe MIL-88 nanorods.

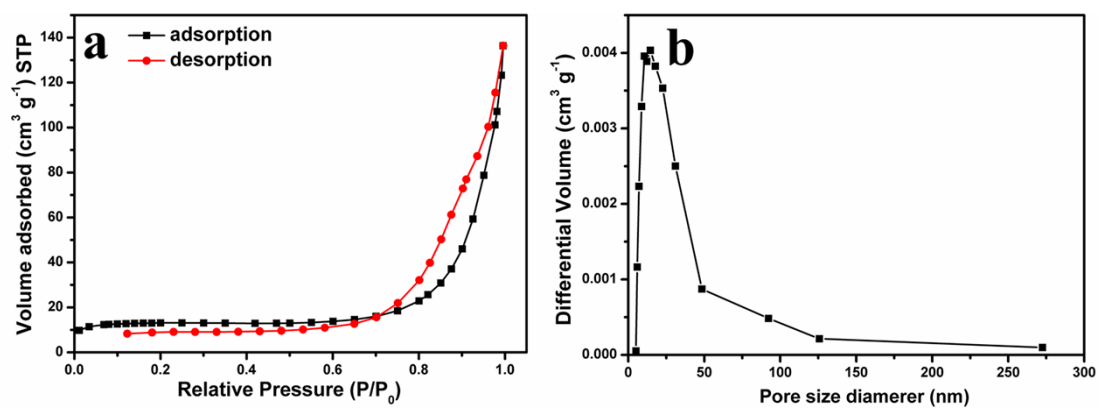

**Fig. S4** (a)  $N_2$  adsorption-desorption isotherms and (b) pore size distribution of  $NiFe_2O_4/Fe_2O_3$  nanotubes.

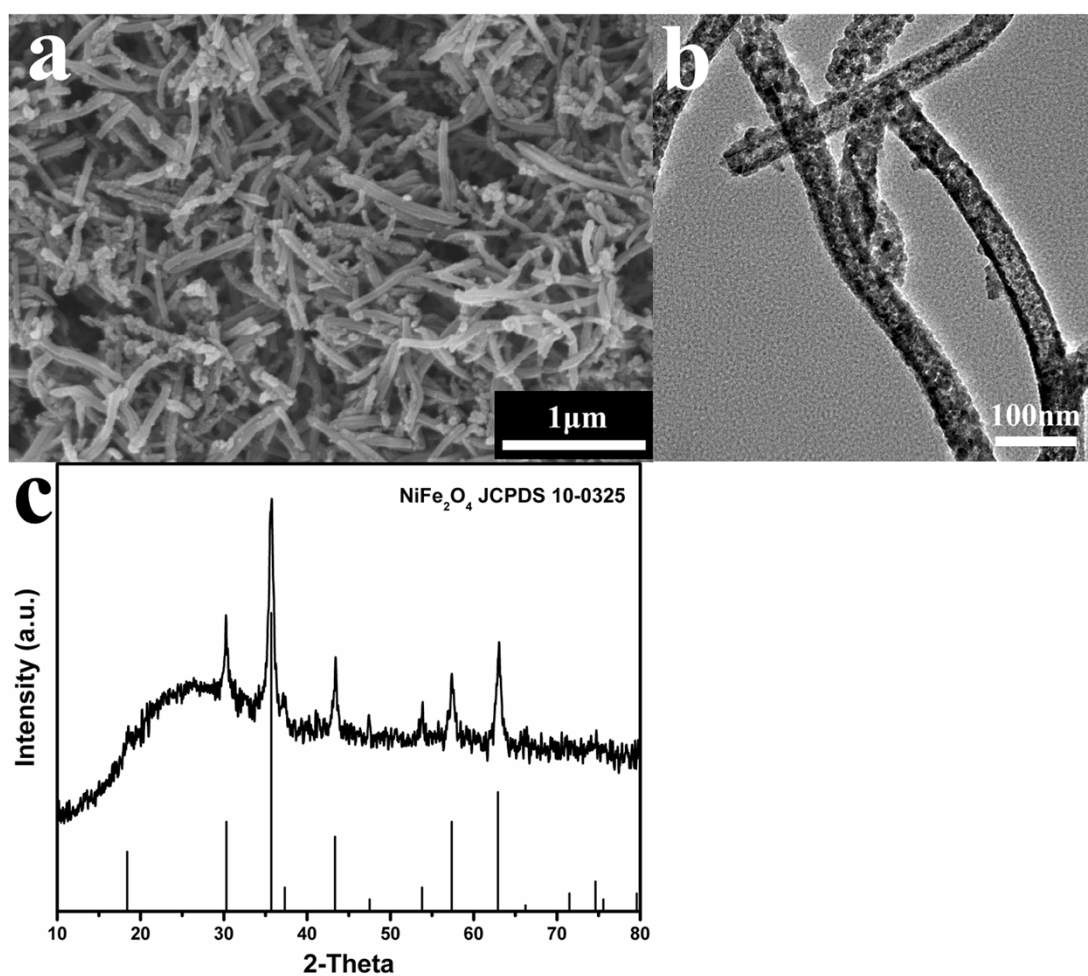

**Fig. S5** (a) SEM (b) TEM and (c) XRD of the as-prepared  $NiFe_2O_4$  nanotubes.

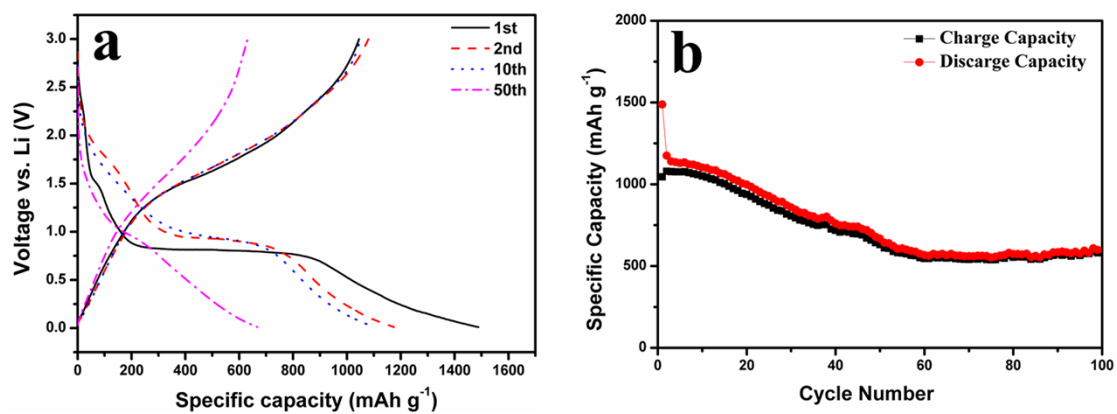

**Fig. S6** (a) Charge–discharge voltage profiles of the  $\text{NiFe}_2\text{O}_4$  for the 1<sup>st</sup>, 2<sup>nd</sup>, 10<sup>th</sup> and 100<sup>th</sup> cycles in the voltage range of 0.01–3.0 V at a current rate of 100  $\text{mA g}^{-1}$  (b) Capacity vs. cycle number of the  $\text{NiFe}_2\text{O}_4$  at a current rate of 100  $\text{mA g}^{-1}$ .
